# Supplementary material for: Surface-enhanced Raman spectroscopy (SERS) for the diagnosis of acute myocardial infarction (AMI) using blood serum samples
Source: Royal Society of Chemistry journal article supplement (doi:10.1039/d4ra03816a), 2024-01-01
Supplement: d4ra03816a1.pdf [file d4ra03816a1.pdf]

Supplementary Information

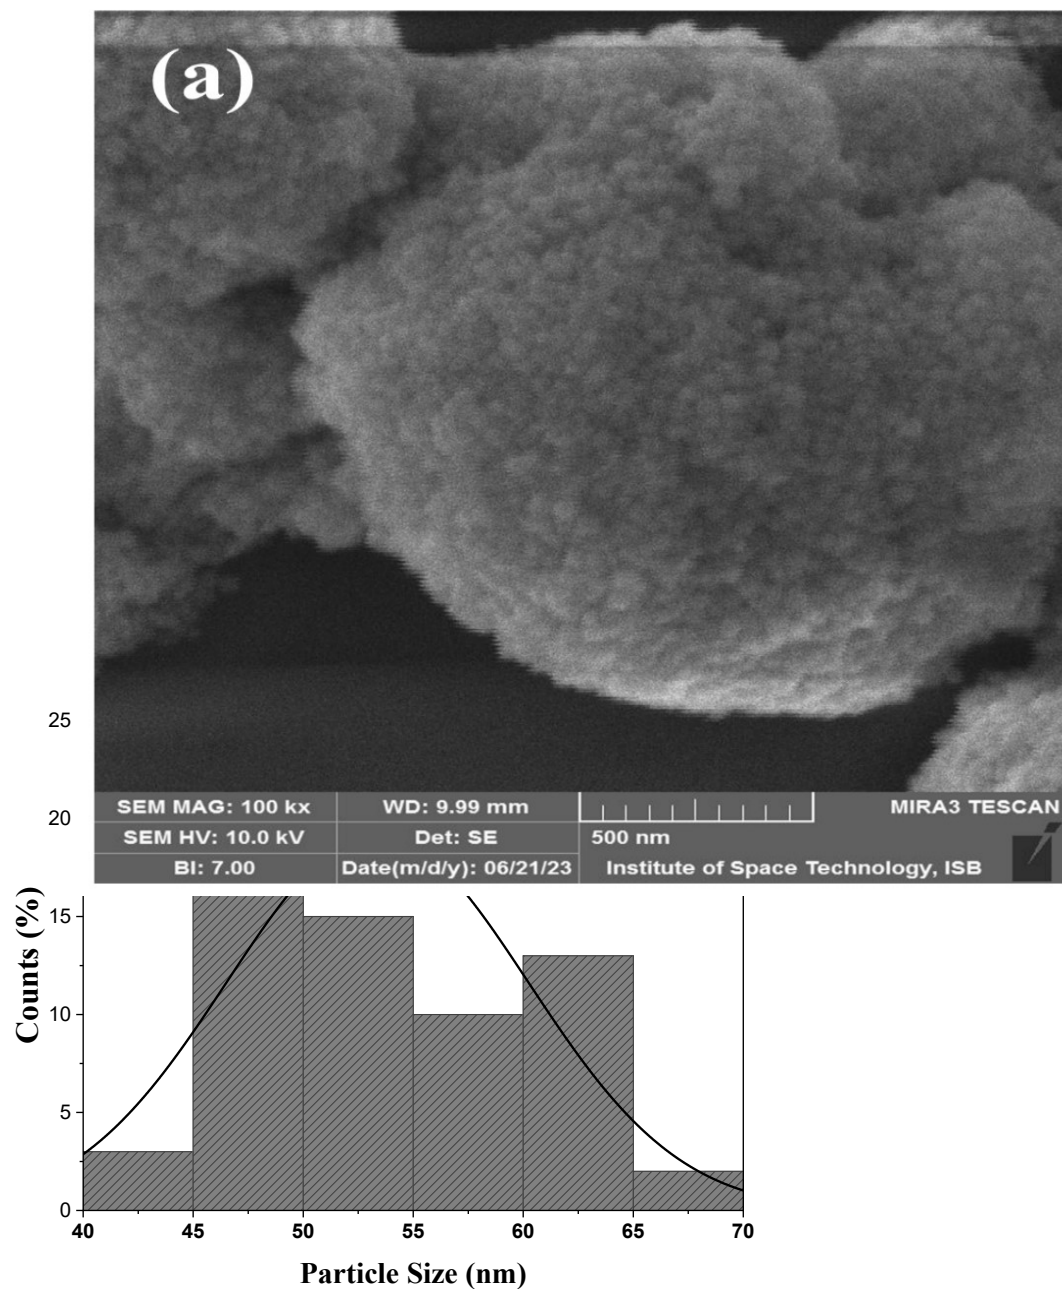

**Fig.:** SEM image of AgNPs (a), Histogram of AgNPs size (b) and elemental analysis of AgNPs through EDX (c).

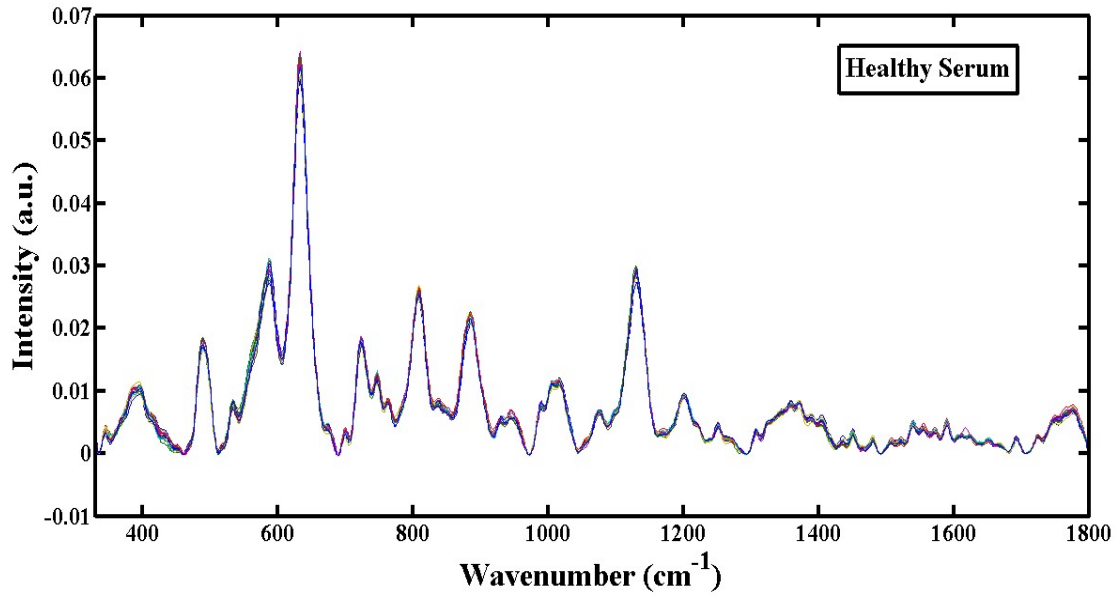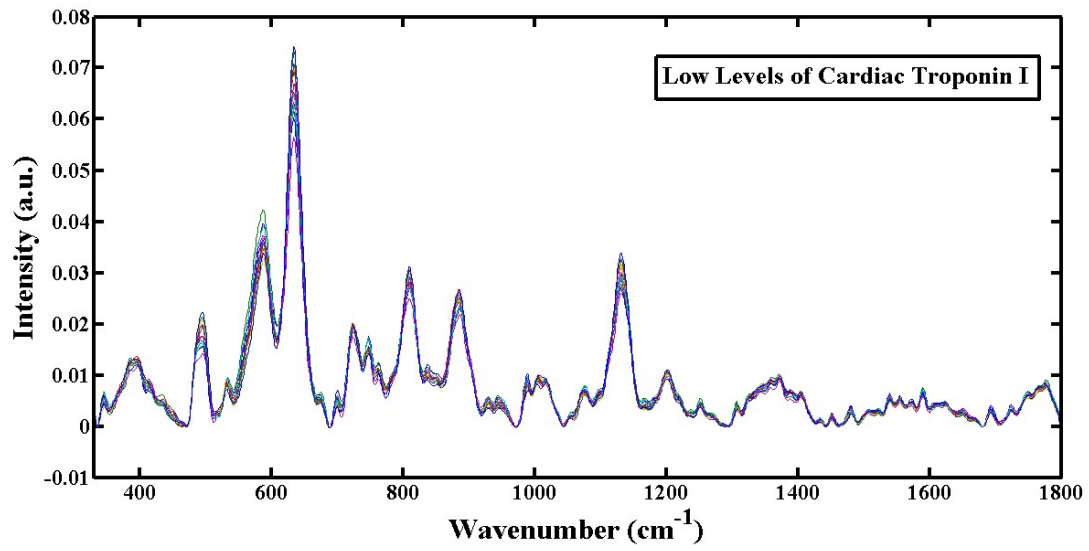

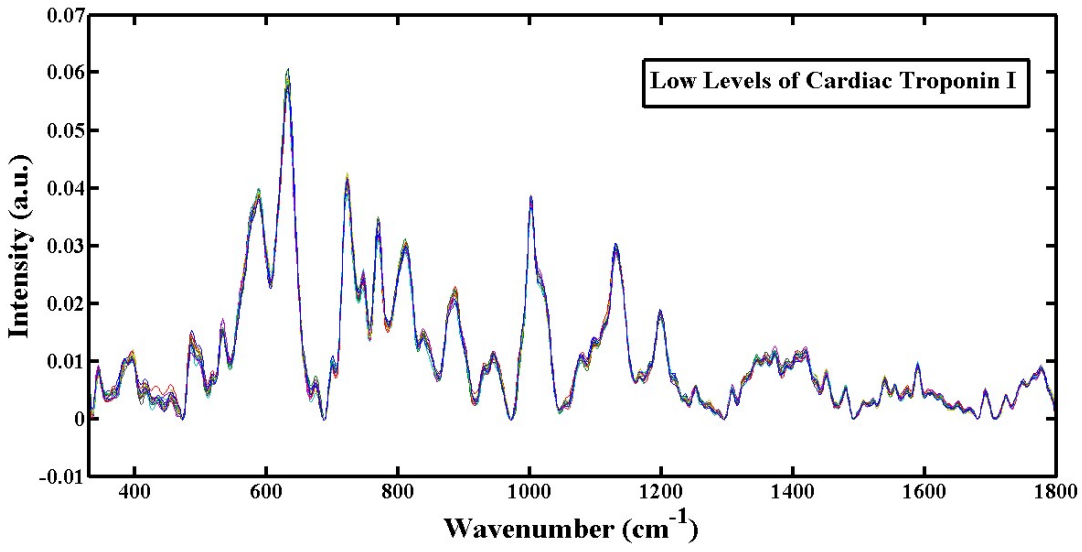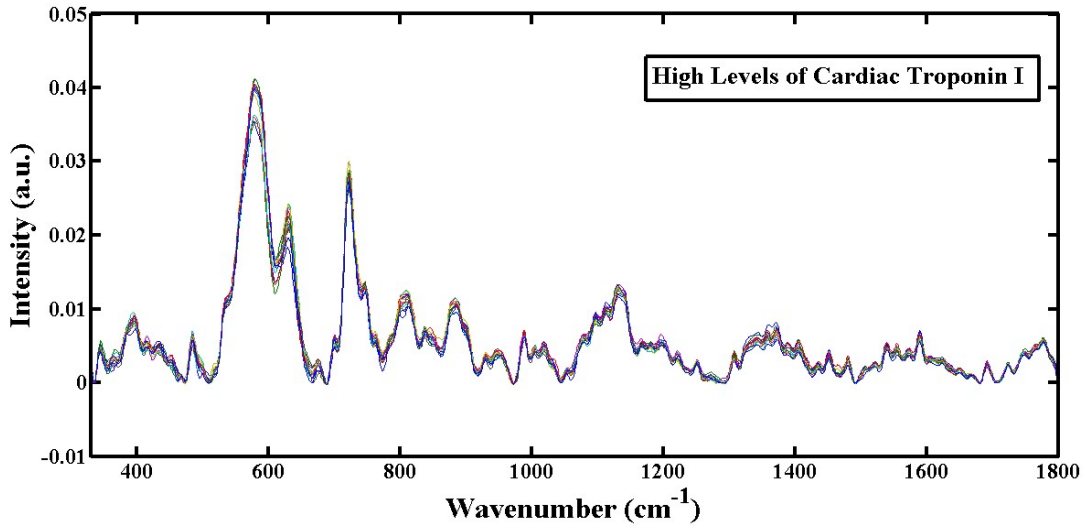

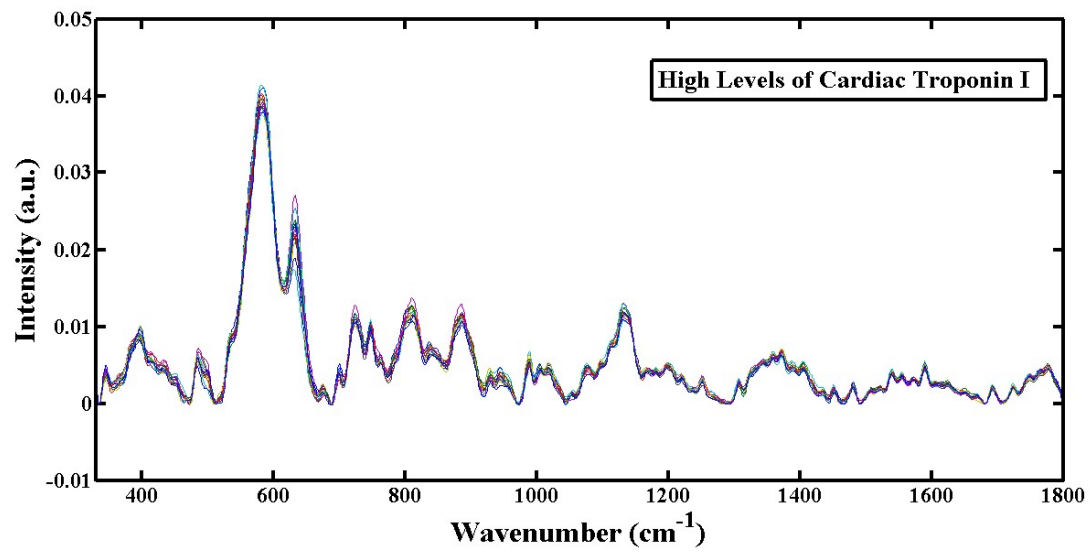

**Fig.** SERS Spectra of different samples of Healthy and cardiac troponin I positive patients showing reproducibility of the SERS technique and signal enhancement of the silver nanoparticles.

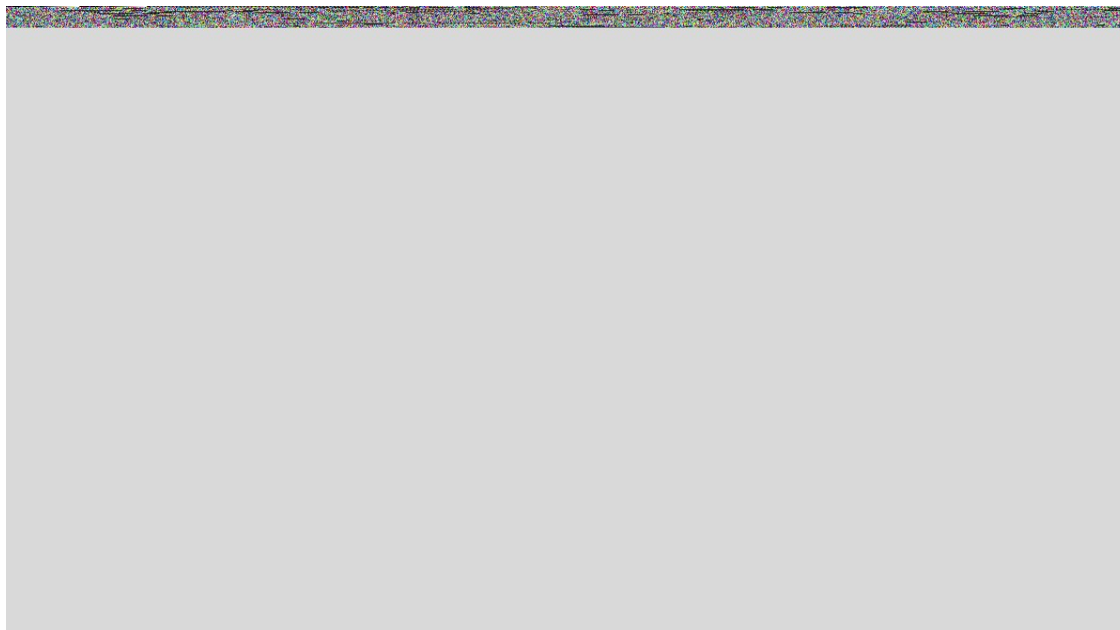

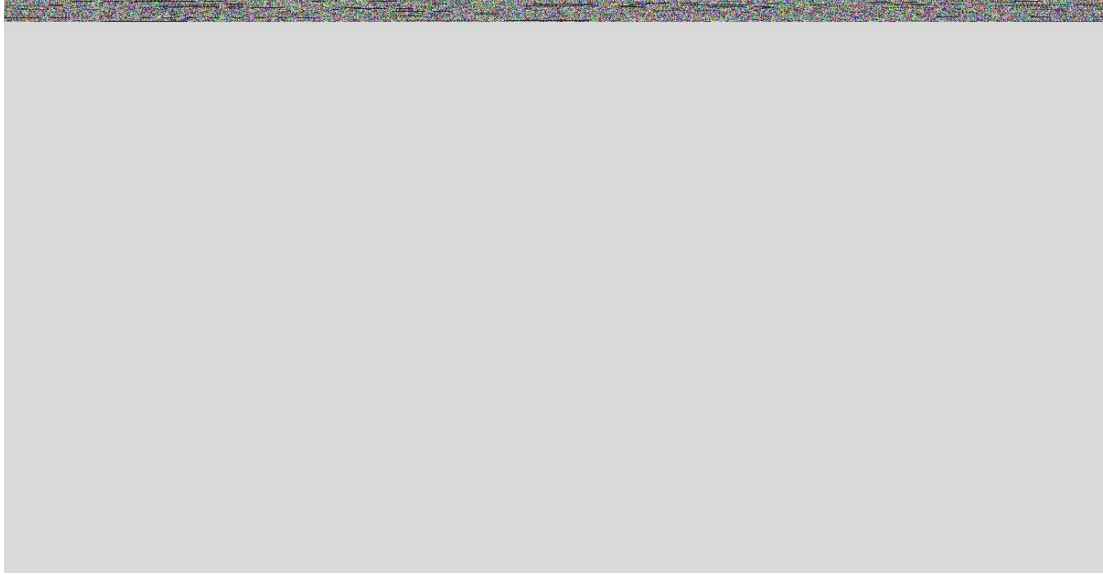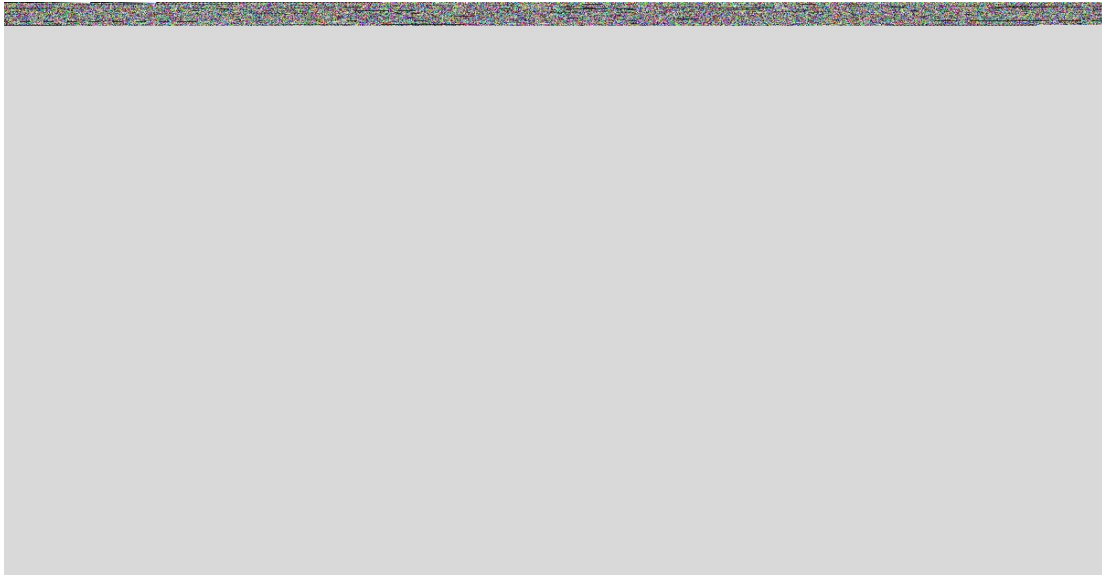

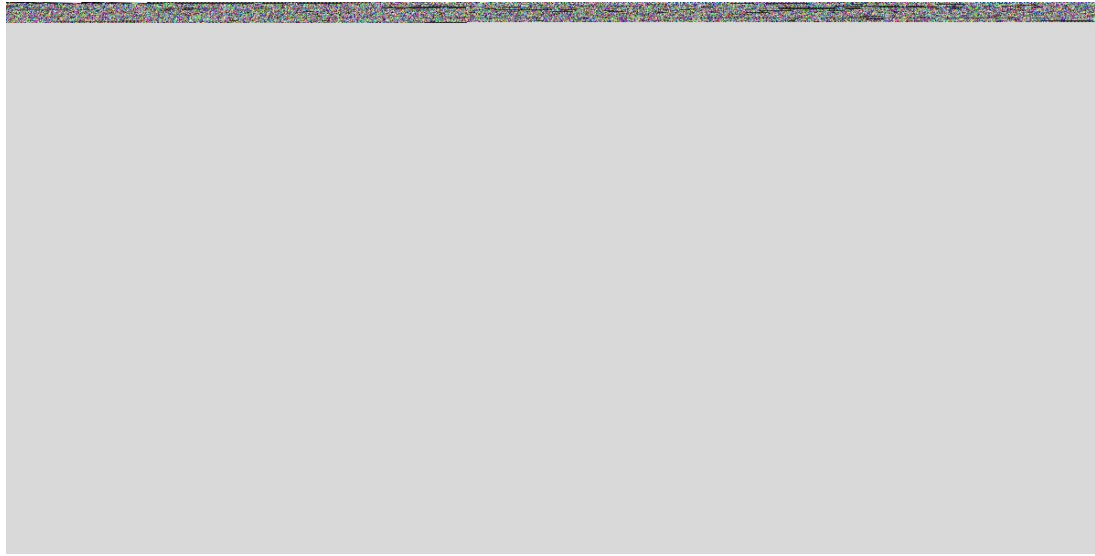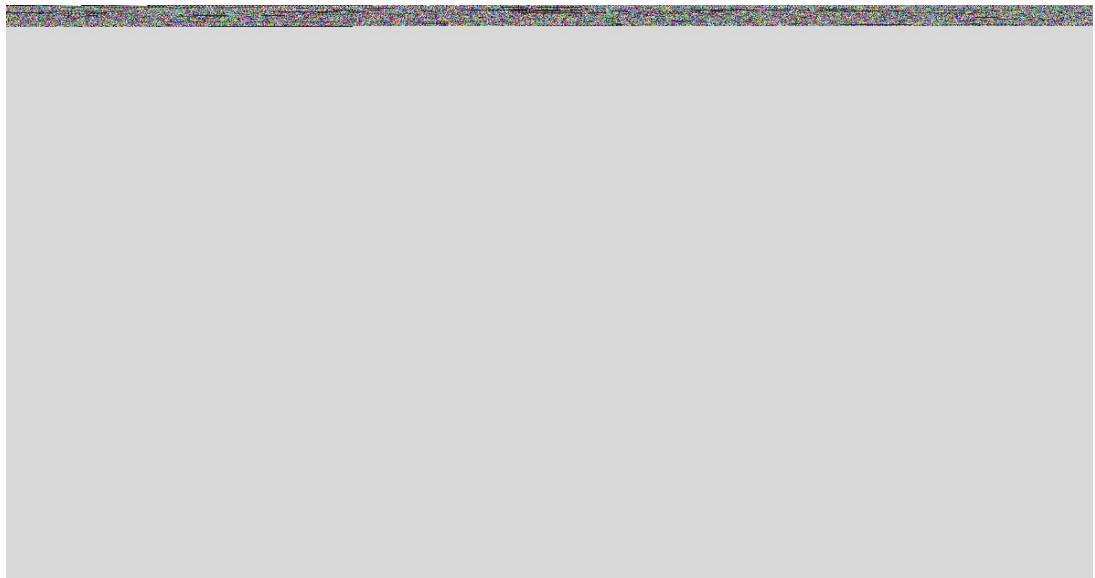

**Fig.** SERS Spectra of different samples of Healthy and cardiac troponin I positive patients showing signal enhancement of the silver nanoparticles.
